# Supplementary material
Source: Springer Nature journal article supplement (https://www.springermedizin.de/resource/supplementary/12885_2013_4534_MOESM2_ESM.pdf/9466644)
Supplement: MOESM2 [file 9466644]

Table S2. Gene expression profiles of various MMPs in hnRNP K knockdown NPC-TW02 cell line

| <b>Genes</b> | <b>Probes</b> | <b>Fold change<br/>hnRNP K-si /control-si</b> |
|--------------|---------------|-----------------------------------------------|
| MMP1*        | 204475_at     | 0.385                                         |
| MMP2*        | 201069_at     | 0.514                                         |
| MMP3         | 205828_at     | 1.248                                         |
| MMP7         | 204259_at     | ND                                            |
| MMP8         | 207329_at     | ND                                            |
| MMP9         | 203936_s_at   | 0.730                                         |
| MMP10*       | 205680_at     | 0.340                                         |
| MMP11        | 203878_s_at   | ND                                            |
| MMP12*       | 204580_at     | 0.057                                         |
| MMP13*       | 205959_at     | 0.202                                         |
| MMP14        | 160020_at     | 1.029                                         |
| MMP15        | 243883_at     | ND                                            |
| MMP16*       | 207012_at     | 0.508                                         |
| MMP17        | 206234_s_at   | ND                                            |
| MMP19        | 204575_s_at   | ND                                            |
| MMP20        | 207599_at     | ND                                            |
| MMP21        | 1552592_at    | ND                                            |
| MMP23B       | 207118_s_at   | ND                                            |
| MMP24        | 208387_s_at   | ND                                            |
| MMP25        | 207890_s_at   | ND                                            |
| MMP26        | 220541_at     | ND                                            |
| MMP27        | 220783_at     | ND                                            |
| MMP28*       | 219909_at     | 0.274                                         |

The relative fold-change of mRNA expression between NPC-TW02 treated with hnRNP K-si and control-si was determined by the mean of two independent Affymetrix microchip analyses. Affymetrix microarrays analysis has been previously described (Chen et al., 2010). Abbreviations and symbols: ND, not detected; \*, 1.5-fold decrease in NPC-TW02 treated with hnRNP K-si compared with control-si.
